# Supplementary material for: Imine–carbene-based ruthenium complexes for dye-sensitized solar cells: the effect of isomeric mixture on the photovoltaic performance
Source: Royal Society of Chemistry journal article supplement (doi:10.1039/d0nj02220a), 2020-01-01

## Supplementary information

### Imine-Carbene based ruthenium complexes for Dye-Sensitized Solar Cells: The Effect of Isomeric Mixture on Photovoltaic Performance

Yogesh S. Tingare <sup>1,\*</sup>, Chaochin Su <sup>1,\*</sup>, Ming-Tai Shen <sup>2</sup>, Sheng-Han Tsai <sup>1</sup>, Shih-Yu Ho <sup>1</sup>, Subhendu Chakroorty<sup>3</sup> and Wen-Ren Li <sup>2,\*</sup>

1. Institute of Organic and Polymeric Materials/Research and Development Center for Smart Textile Technology, National Taipei University of Technology, Taipei 10608, Taiwan, ROC. [kieferboy8@hotmail.com](mailto:kieferboy8@hotmail.com) (S.-H. T.); [stacy760414@hotmail.com](mailto:stacy760414@hotmail.com) (S.-Y. H).
  2. Department of Chemistry, National Central University, Chung-Li, Taiwan 32001, ROC. [moodplayer@hotmail.com](mailto:moodplayer@hotmail.com) (M.-T S.)
  3. School of Sciences, Auro University, Surat, India. [Subhendu.chakroorty@aurouniversity.edu.in](mailto:Subhendu.chakroorty@aurouniversity.edu.in) (S.C)
- \* Correspondence: [yogeshtingare@yahoo.co.in](mailto:yogeshtingare@yahoo.co.in) (Y. S. T.); [f10913@mail.ntut.edu.tw](mailto:f10913@mail.ntut.edu.tw) (C.-C. S.); [ch01@ncu.edu.tw](mailto:ch01@ncu.edu.tw) (W.-R. L.)

#### 1. Electrochemical measurement.<sup>1</sup>

Cyclic voltammetry (CV) analyses were performed using a CHI 627 C electrochemical analyzer (CH Instruments) and a conventional single-compartment, three-electrode cell. A glassy carbon electrode and a silver wire (Ag/AgNO<sub>3</sub> in acetonitrile) were used as the working electrode and the reference electrode, respectively while a Pt wire was utilized as a counter electrode. Dye solutions were prepared at a concentration of 1×10<sup>-3</sup> M in DMF and a 0.1 M solution of tetrabutylammonium hexafluorophosphate was used as the supporting electrolyte. Ferrocene was utilized as the internal reference for the calibration of the obtained redox potentials. The cyclic voltammograms of **IC101** and **IC102** were recorded at a typical scan rate of 50 mV s<sup>-1</sup>.

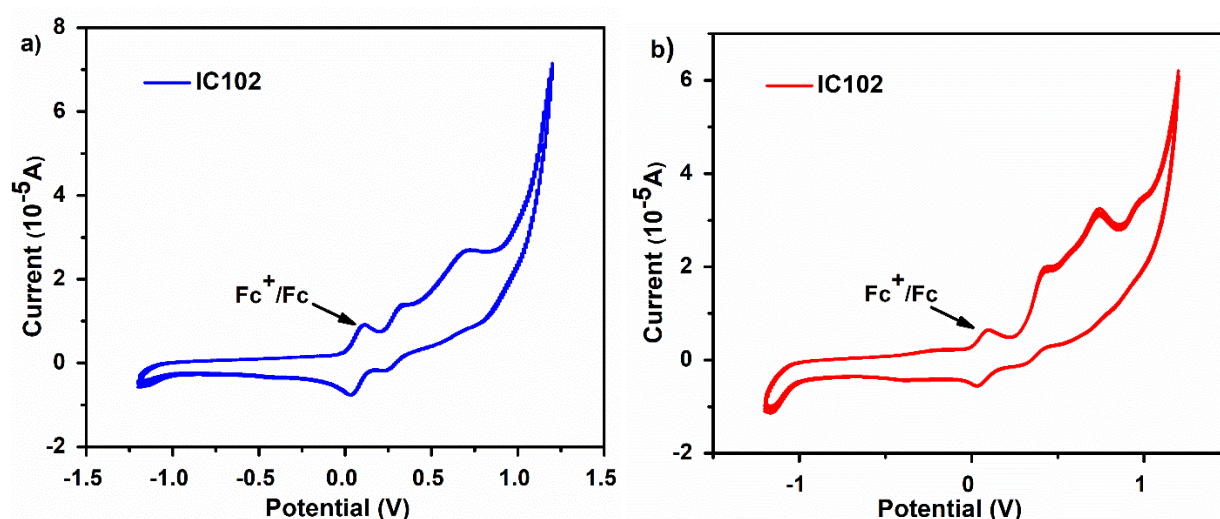

Figure S1: cyclic voltammogram plots for sensitizer **IC101** (a) and **IC102** (b).

## 2. Theoretical calculation for the location of HOMOs and LUMOs

The location of the frontier orbitals of **IC101** and **IC102** sensitizers were computed using the Gaussian 09W program package and the DFT/B3LYP/LANL2DZ parameters set.

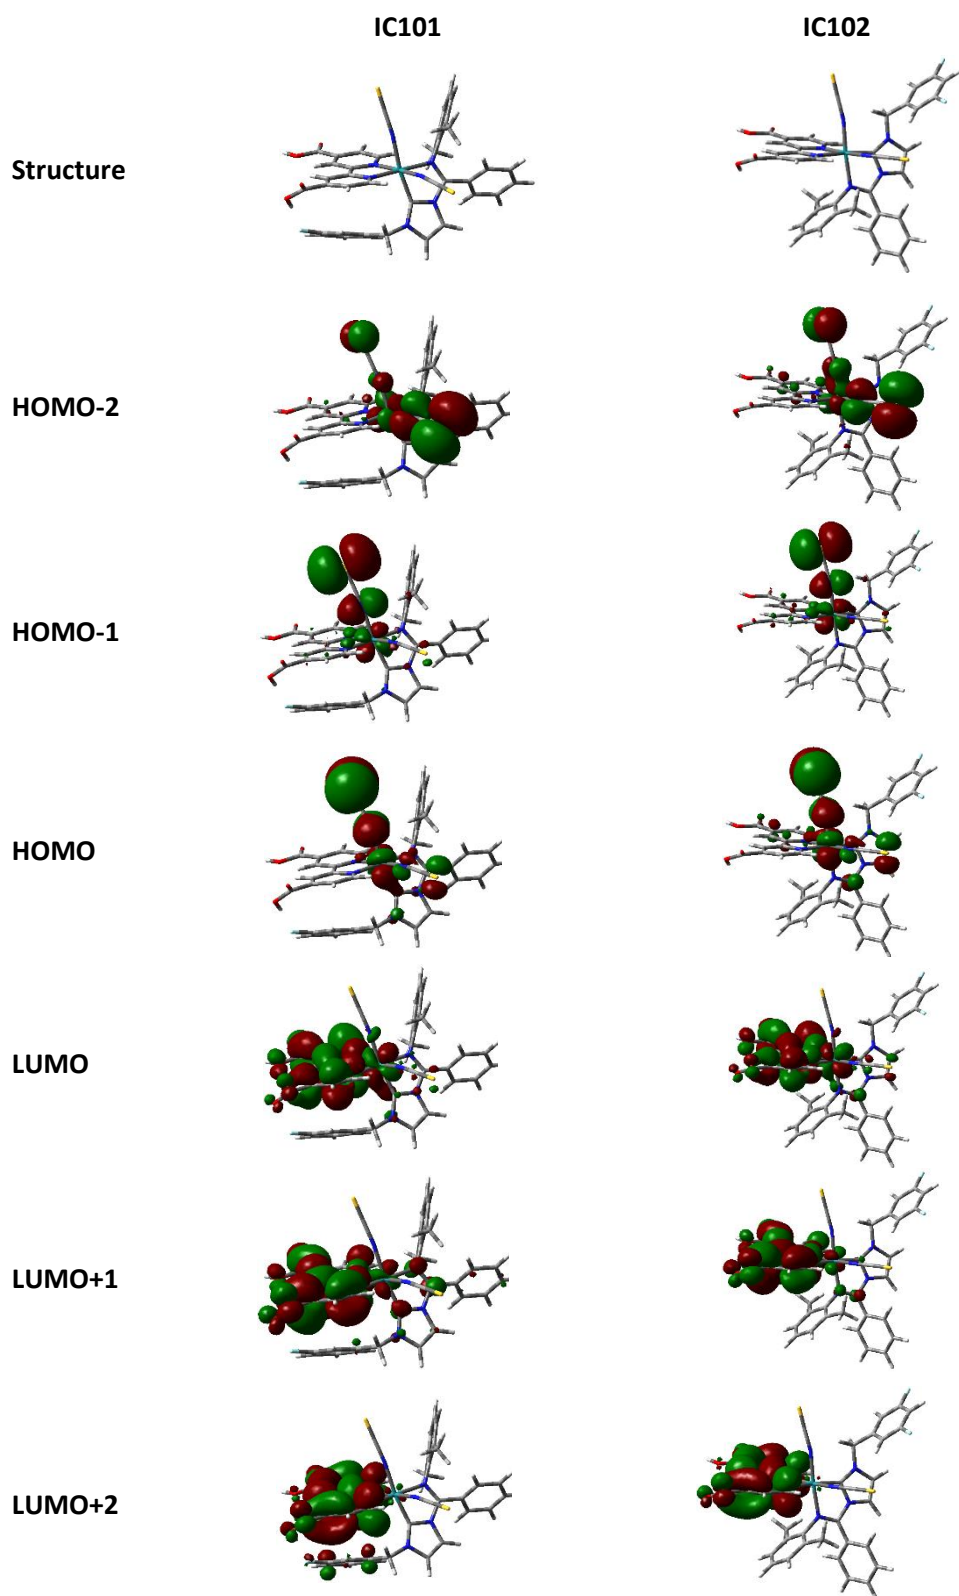

**Figure S2:** Frontier orbital representations of **IC101** and **IC102** sensitizers.

### Preparation of TiO<sub>2</sub> electrodes and DSSC devices.<sup>2</sup>

The preparation of the TiO<sub>2</sub> nanoparticles was carried out by a hydrothermal process as follows. The starting precursor Ti(OBu)<sub>4</sub> (22.0 g) was dissolved in 2.0 M CH<sub>3</sub>COOH (aq) (108.4 mL) and then stirred vigorously for 5 days. The resulting homogeneous solution was subjected to the hydrothermal treatment in an autoclave at 200 °C for 5 h, and then the obtained TiO<sub>2</sub> colloidal solution was centrifuged twice with ethanol. The residue was dissolved in absolute ethanol (60 mL) and the mixture was stirred vigorously followed by ultra-sonication. The resulting solution was mixed with  $\alpha$ -terpineol (38.94 g) and a mixture of ethyl cellulose (10 cps, 2.73 g and 45 cps, 2.10 g) in anhydrous ethanol (43.5 mL) and then sonicated repeatedly. The solvent was evaporated under a reduced pressure of 70 mbar and  $\alpha$ -TiO<sub>2</sub> was obtained after grinding. For the preparation of the TiO<sub>2</sub> scattering layer, in a round bottom flask, 2.0 g of QF-1125 TiO<sub>2</sub> powder of particle size around 200–300 nm was suspended in 80 mL anhydrous ethanol. After sonication for 2 min, the above solution was combined with  $\alpha$ -terpineol (12.98 g) and a solution of ethyl cellulose (10 cps, 0.90 g and 45 cps, 0.70 g) in anhydrous ethanol (14.4 mL). The mixture was then subjected to repeated sonication. Finally, the dispersed solution was concentrated by using an evaporator at 40 °C with 70 mbar. The QF-1125 paste was obtained after grinding by using a three roll mill grinder. The TiO<sub>2</sub> electrode was prepared by spreading the TiO<sub>2</sub> paste onto fluorine-doped SnO<sub>2</sub> conducting glass (FTO, Hartford Glass; sheet resistance:  $8\Omega\Box^{-1}$ ; transmittance  $\geq 80\%$ ; haze 5%). Subsequently, the TiO<sub>2</sub> electrodes were dried in air and heated at 100 °C for 15 min, followed by annealing at 450 °C for 30 min. The TiO<sub>2</sub> scattering layer was also coated followed by the above procedure using the QF-1125F TiO<sub>2</sub> paste. The average thickness of the TiO<sub>2</sub> film was 15  $\mu\text{m}$ , measured using a Force EZstep profiler. The resulting TiO<sub>2</sub> electrode was scraped to an active area of 0.25 cm<sup>2</sup> (0.5 cm  $\times$  0.5 cm), followed by heat treatment at 80 °C. Dye solutions of **N719**, **IC101**, and **IC102** with  $3 \times 10^{-4}$  M concentration in 1 : 1 CH<sub>3</sub>CN/*t*-BuOH (v/v) were prepared and then the electrodes were soaked for 36 h. The Pt counter electrodes were prepared by sputter-deposition of 20 nm thick Pt layers onto FTO substrates using a Hitachi E-1045 ion sputter. Prior to assembling of the DSSCs, two holes were drilled on the counter electrodes. The Pt electrodes were then placed over the dye-adsorbed TiO<sub>2</sub> electrodes. The edges of the cells were sealed with a Surlyn 1702 (DuPont; thickness: 125  $\mu\text{m}$ ) spacer at 100 °C. To complete the DSSC fabrication, the electrolyte was injected into the intervening space between the TiO<sub>2</sub> and Pt electrodes through the two holes, which were then covered with a microscope slide and sealed with a Surlyn spacer. The electrolyte solution comprised of 0.5 M lithium iodide, 0.05 M iodide, 0.5 M 1,2-dimethyl-3-propylimidazolium iodide, and 0.5 M tert-butylpyridine in acetonitrile was employed as the redox mediator.

### DSSC performance measurements.<sup>2</sup>

Photovoltaic parameters were measured by utilizing a Keithley model 2400 source unit equipped with an A-class solar simulator of a 300 W Xenon light source (Oriel, no. 91160) with an AM 1.5 filter (Oriel, no. 81094). The power of the output light at the cell measuring position was calibrated to 100 mW cm<sup>-2</sup> using a certified reference cell (PVM134, PV Measurement, Inc.). To measure the incident photon-to-current conversion efficiencies (IPCEs), equipment comprised of a 150 W Xenon lamp source (Oriel, no. 66902), a monochromator (Oriel Cornerstone TM 130) and a Keithley model 2400 was employed.

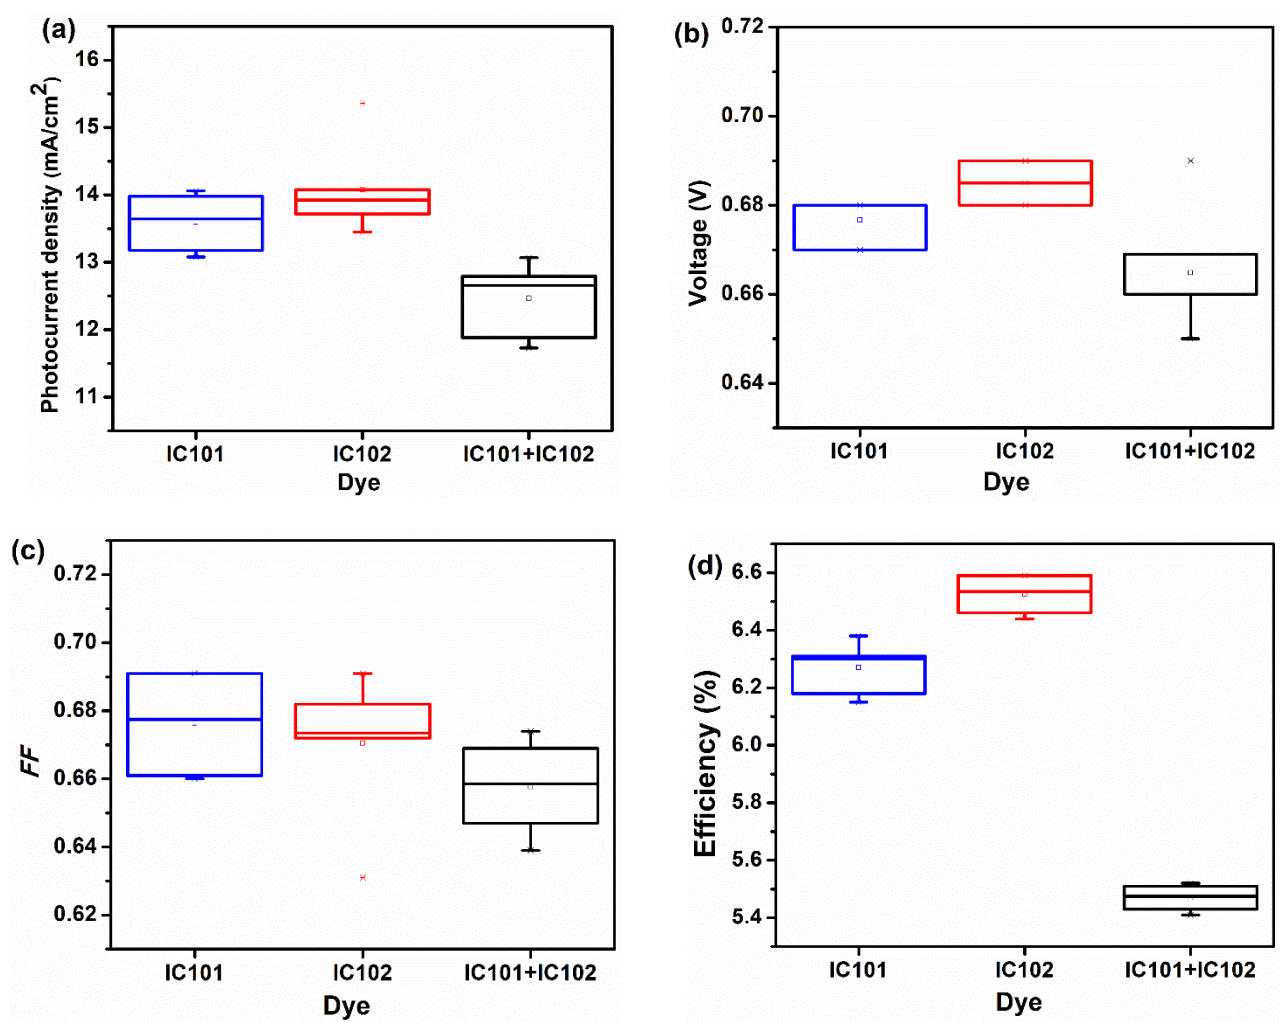

**Figure S3:** (a)  $J_{sc}$ , (b)  $V_{oc}$ , (c)  $FF$ , (d) efficiency ( $\eta$ ) of 6 devices of IC101, IC102, IC101+IC102 sensitizers.

**Table S1:** Photovoltaic parameters of devices incorporating with different ratios of IC101+IC102 sensitizers.

| Dye         | Ration | $J_{sc}$<br>( $\text{mA}/\text{cm}^2$ ) | $V_{oc}$<br>(V) | $FF$  | $\eta$<br>(%) |
|-------------|--------|-----------------------------------------|-----------------|-------|---------------|
| IC101+IC102 | 1:0    | 14.06                                   | 0.680           | 0.661 | 6.31          |
|             | 0:1    | 15.36                                   | 0.680           | 0.631 | 6.59          |
|             | 1:2    | 13.08                                   | 0.670           | 0.691 | 6.06          |
|             | 1:1    | 13.07                                   | 0.660           | 0.639 | 5.51          |
|             | 2:1    | 11.92                                   | 0.670           | 0.679 | 5.42          |

#### Reference:

1. a) Cardona, C. M.; Li, W.; Kaifer, A. E.; Stockdale, D.; Bazan, G. C. *Adv. Mater.* **2011**, *23*, 2367. b) Hua, Y.; Xu, B.; Liu, P.; Chen, H.; Tian, H.; Cheng, M.; Kloo, L.; Sun, L. *Chem. Sci.* **2016**, *7*, 2633. C) Lim, K.; Kang, M.-S.; Myung, Y.; Seo, J.-H.; Banerjee, P.; Marks, T. J.; Ko, J. *J. Mater. Chem. A* **2016**, *4*, 1186.
2. Y. S. Tingare, S. B. Akula, M.-T. Shen, C. Su, S.-Y. Ho, S.-H. Tsai, Y.-F. Lin and W.-R. Li, *Dalton Trans.*, 2018, **47**, 8356-8363

Figure S4:  $^1\text{H}$ NMR,  $^{13}\text{C}$ NMR and Mass spectra.

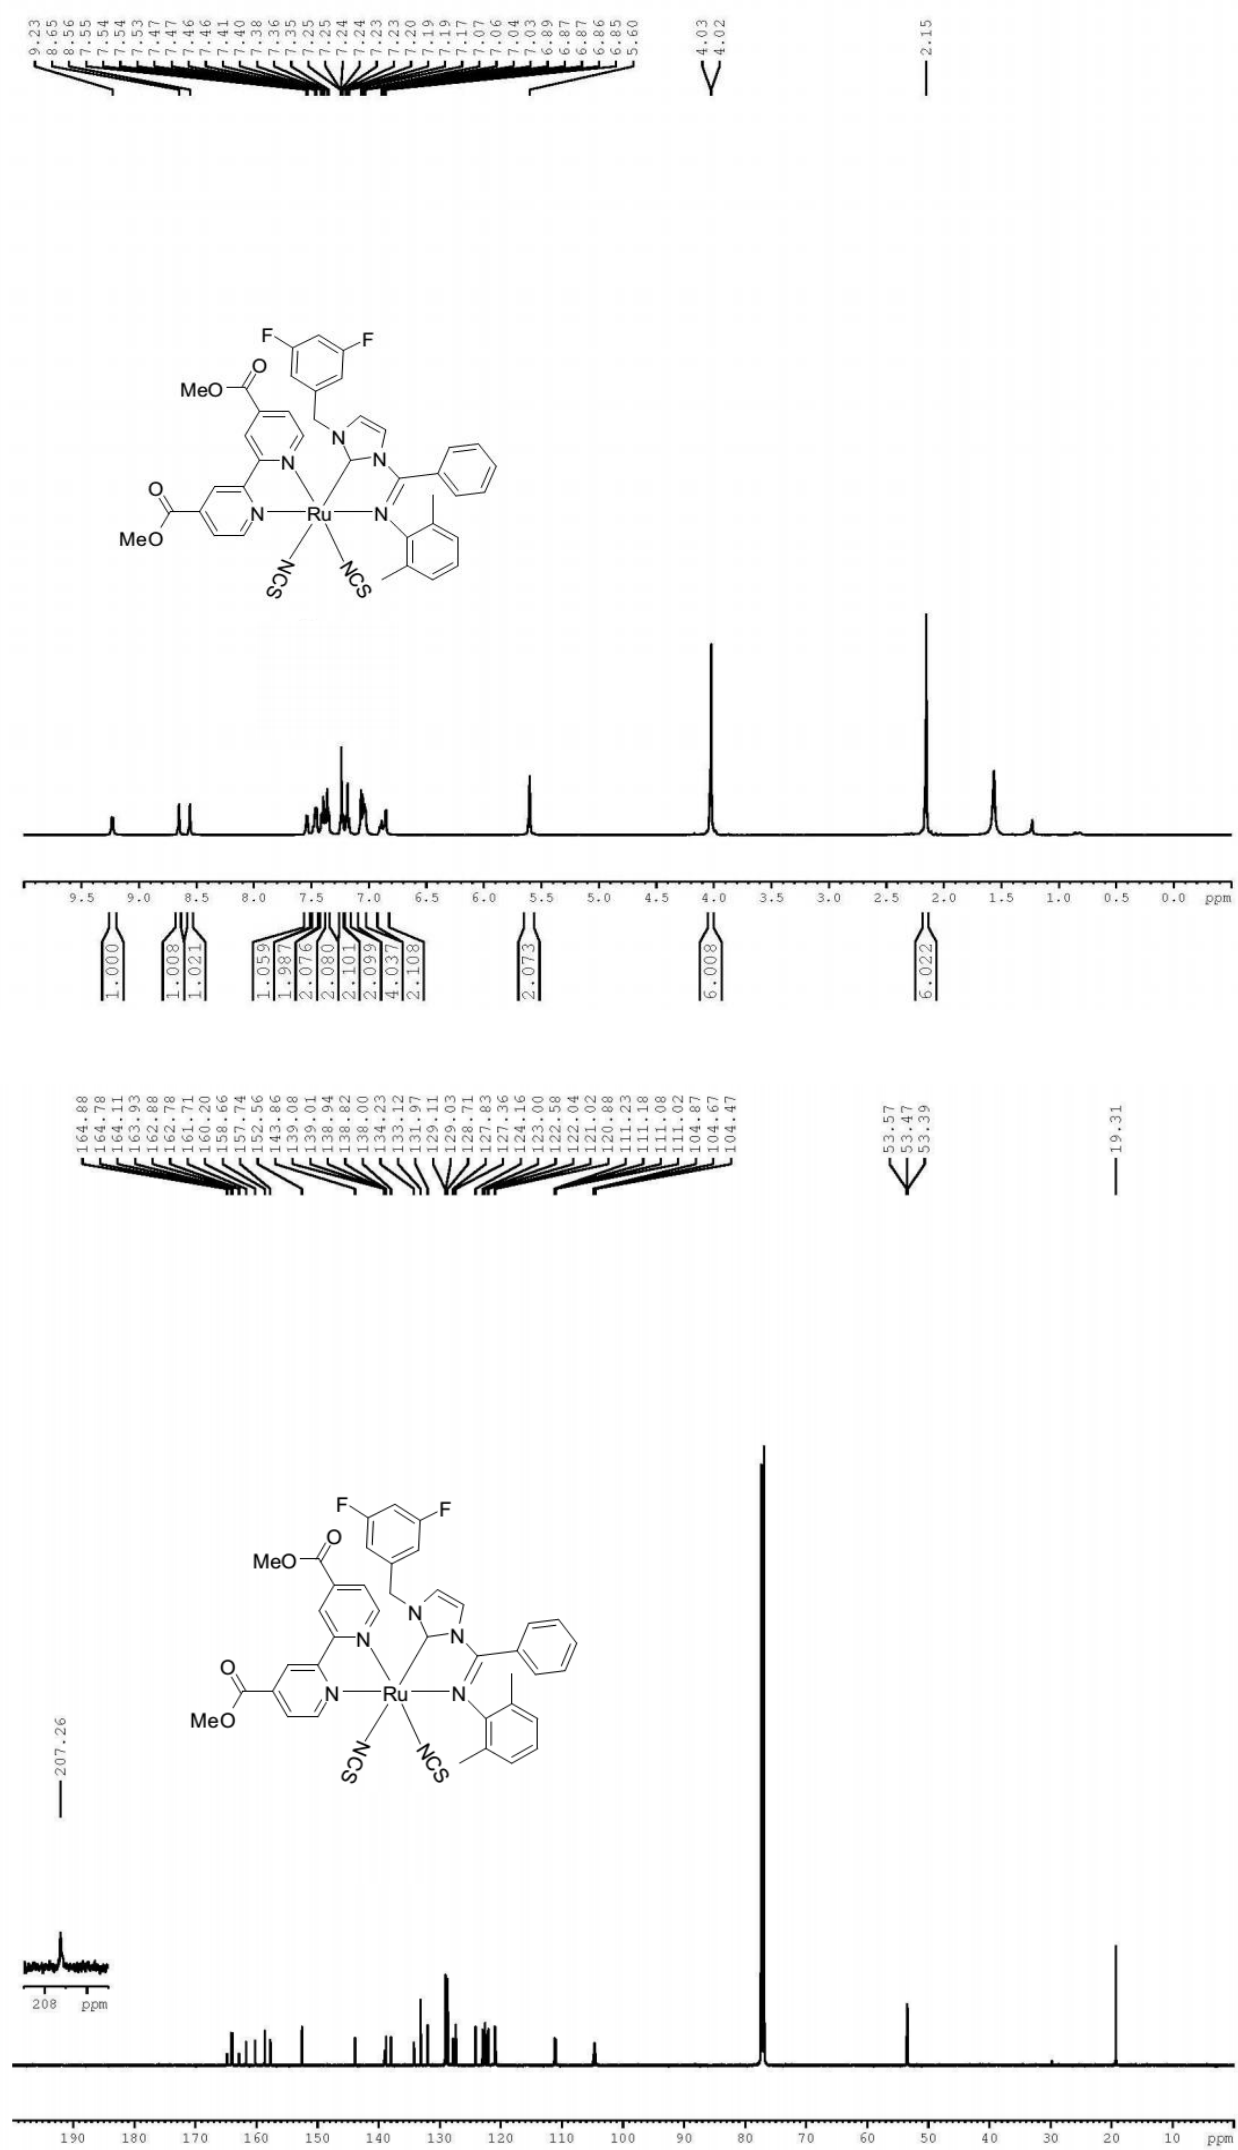

22-IC101-1-ester-H#1-12 RT: 0.01-0.57 AV: 12

T: FTMS + p ESI Full ms [150.00-2000.00]

m/z= 891.94-892.29

Isotope Min Max

O-16 0 5

C-12 0 42

H-1 0 35

N-14 0 8

Ru-102 0 1

S-32 0 2

F-19 0 2

Charge 1

Mass tolerance 1000.00 ppm

Nitrogen rule not used

RDB equiv -1.00-100.00

max results 1

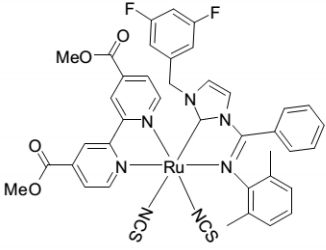

| m/z      | Intensity | Relative | Theo. Mass | Delta (ppm) | Composition                                                                                    |
|----------|-----------|----------|------------|-------------|------------------------------------------------------------------------------------------------|
| 892.1132 | 72947.9   | 100.00   | 892.1120   | 1.40        | C <sub>41</sub> H <sub>34</sub> O <sub>4</sub> N <sub>7</sub> F <sub>2</sub> Ru S <sub>2</sub> |

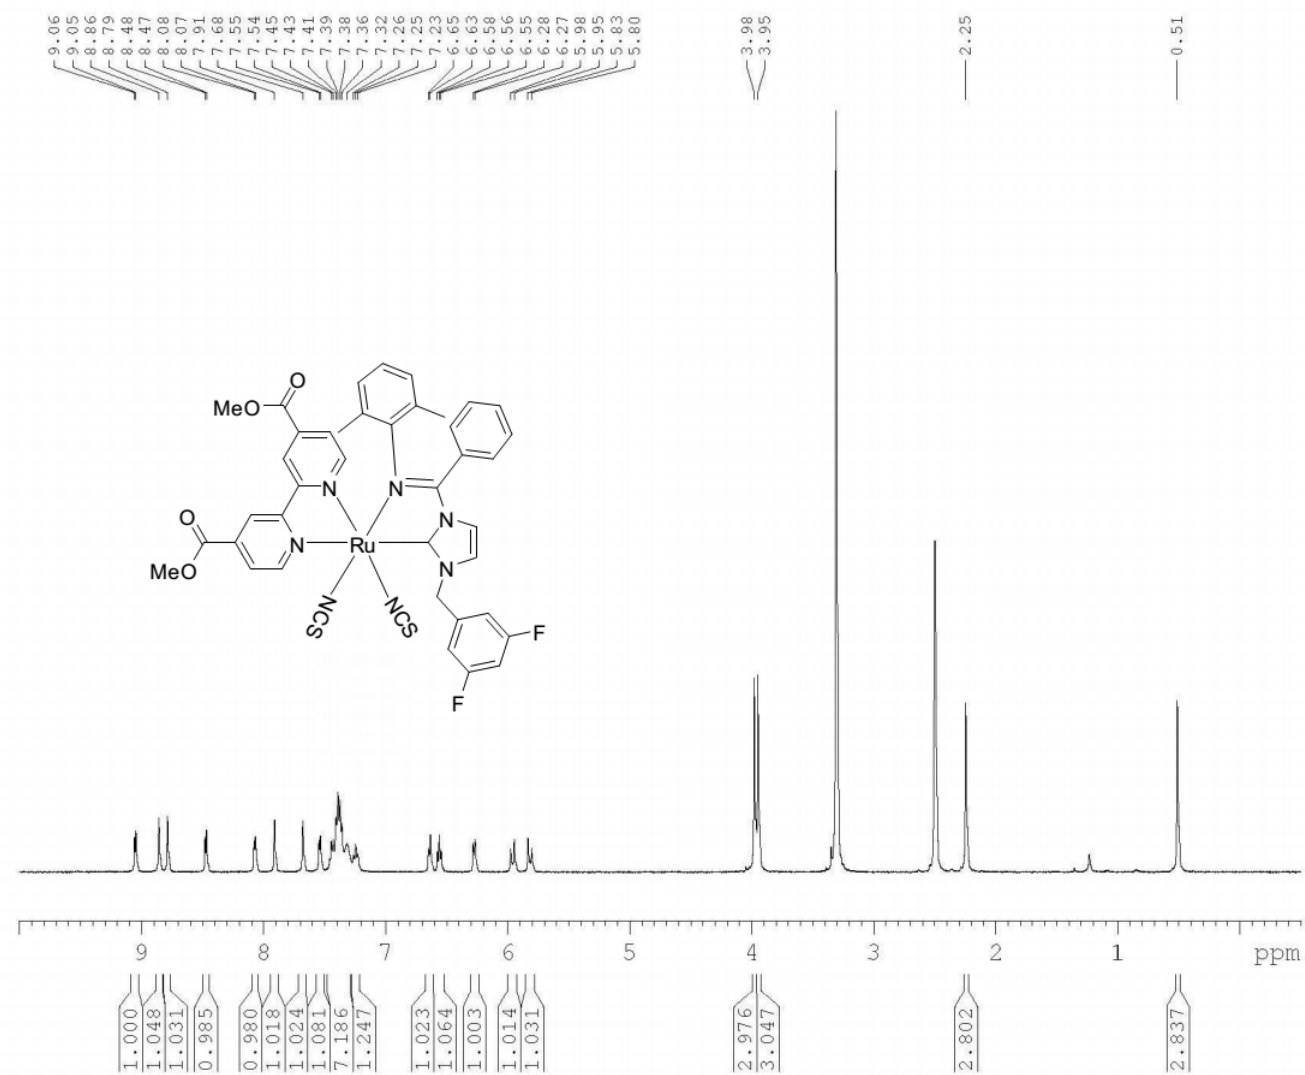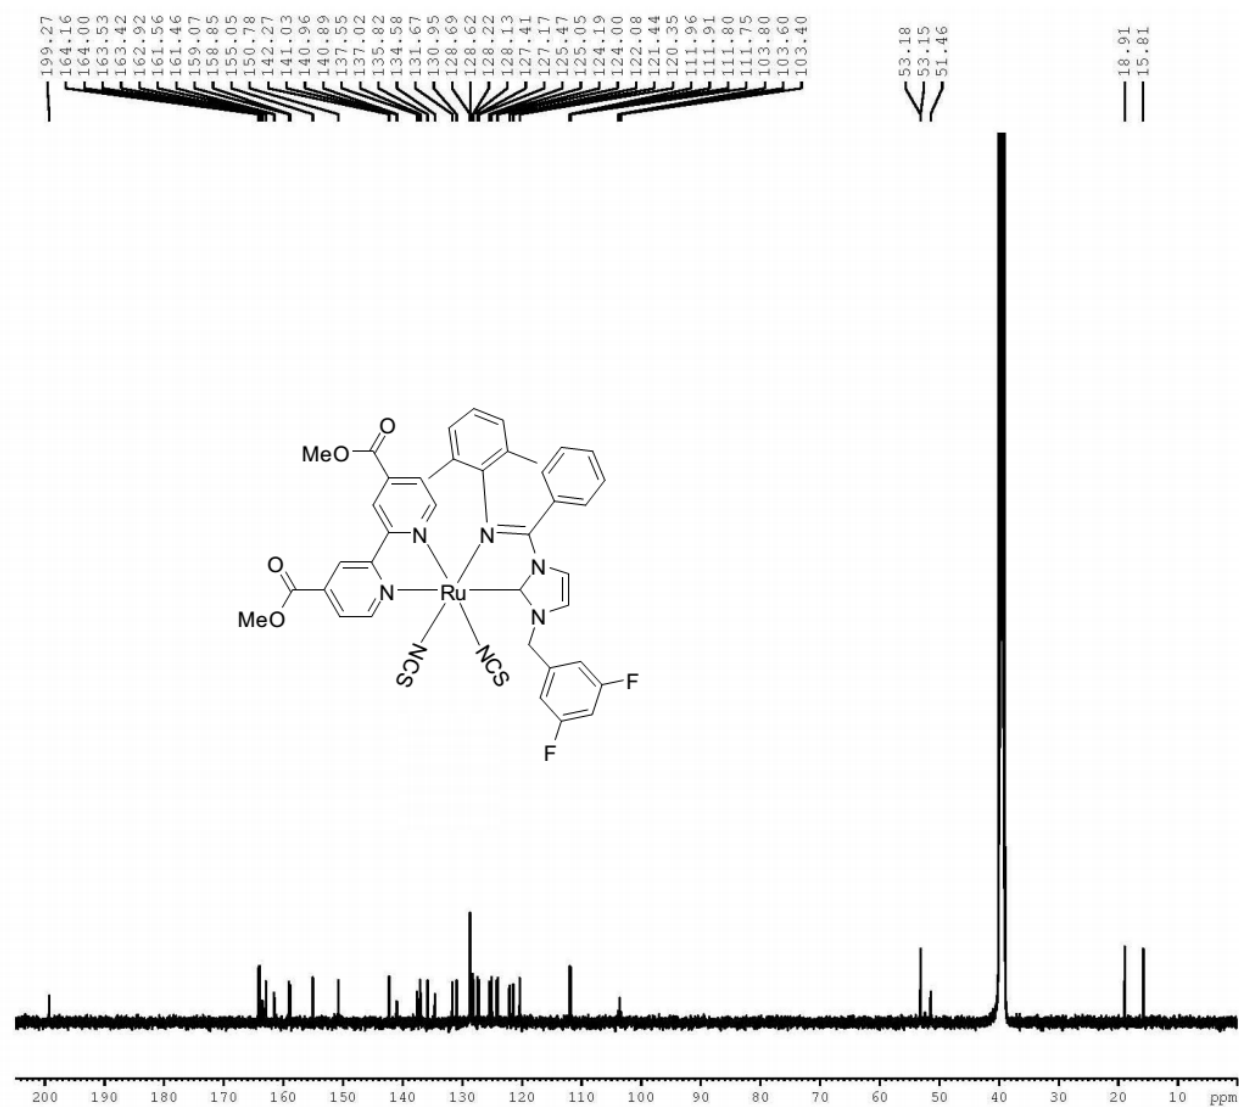

112-IC101-2-ester-H#1-20 RT: 0.01-0.28 AV: 20

T: FTMS - p ESI Full ms [150.00-2000.00]

m/z= 889.75-890.68

Isotope Min Max

N-14 0 7

O-16 0 4

C-12 0 41

H-1 0 35

F-19 0 2

S-32 0 2

Ru-102 0 1

Charge 1

Mass tolerance 10.00 ppm

Nitrogen rule not used

RDB equiv -1.00-100.00

max results 1

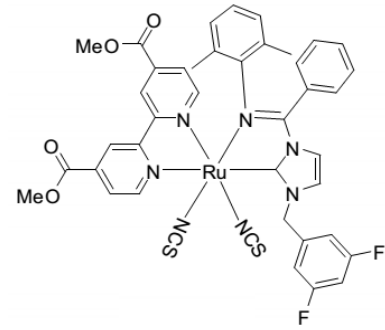

| m/z      | Intensity | Relative | Theo. Mass | Delta (ppm) | Composition                                                                                    |
|----------|-----------|----------|------------|-------------|------------------------------------------------------------------------------------------------|
| 890.0962 | 22525.4   | 100.00   | 890.0963   | -0.11       | C <sub>41</sub> H <sub>32</sub> O <sub>4</sub> N <sub>7</sub> F <sub>2</sub> Ru S <sub>2</sub> |

9.516  
9.505  
9.011  
8.909  
7.880  
7.869  
7.557  
7.542  
7.528  
7.517  
7.502  
7.497  
7.482  
7.390  
7.386  
7.371  
7.357  
7.293  
7.277  
7.264  
7.251  
7.233  
7.203  
7.189  
7.173  
7.120  
7.108  
5.777  
5.757

2.066

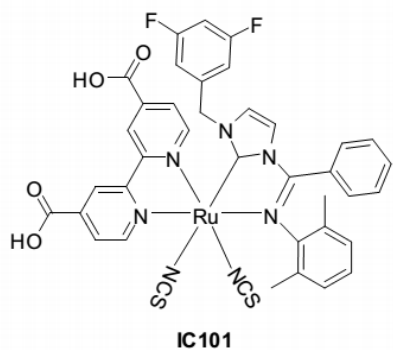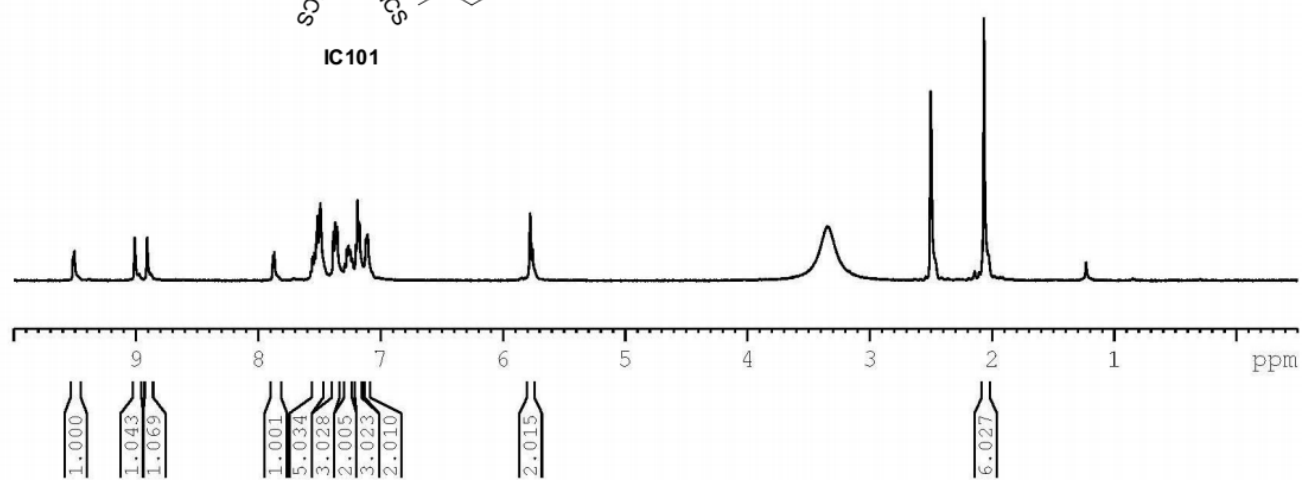

163.65  
163.54  
161.68  
161.57  
161.39  
159.13  
158.85  
157.69  
151.02  
143.76  
140.48  
139.88  
139.80  
139.72  
139.43  
133.69  
132.30  
131.80  
128.93  
128.87  
128.42  
127.53  
127.14  
123.91  
123.63  
123.39  
122.61  
121.87  
120.92  
112.28  
112.23  
112.12  
112.08  
104.25  
104.04  
103.84

52.87

18.63

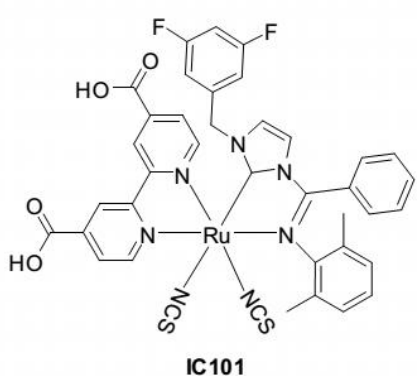

205.13

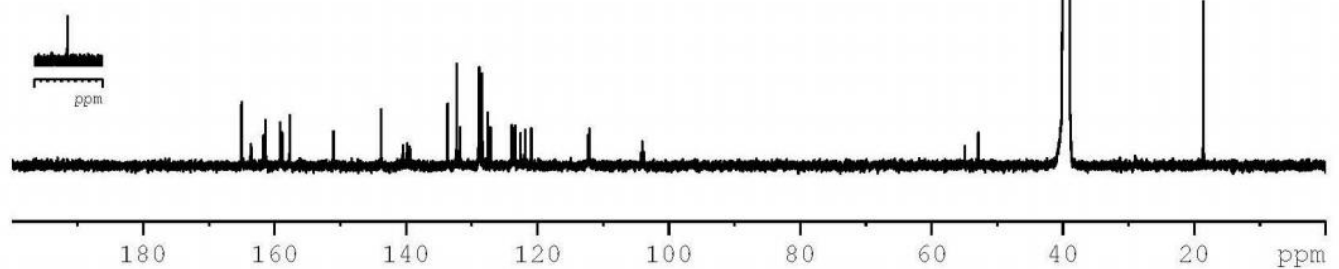

64-IC101-1-acid-H#1-20 RT: 0.00-0.28 AV: 20

T: FTMS + p ESI Full ms [150.00-2000.00]

m/z= 857.58-870.47

Isotope Min Max

C-12 0 39

H-1 0 30

F-19 0 2

N-14 0 7

O-16 0 4

Ru-102 0 1

S-32 0 2

Charge 1

Mass tolerance 10.00 ppm

Nitrogen rule not used

RDB equiv -1.00-100.00

max results 1

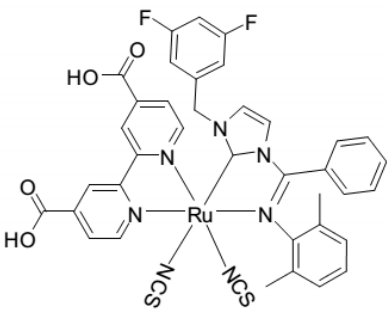

IC101

| m/z      | Intensity | Relative | Theo. Mass | Delta (ppm) | Composition                                                                                    |
|----------|-----------|----------|------------|-------------|------------------------------------------------------------------------------------------------|
| 863.0721 | 56342.6   | 100.00   | 863.0729   | -0.86       | C <sub>39</sub> H <sub>29</sub> O <sub>4</sub> N <sub>7</sub> F <sub>2</sub> Ru S <sub>2</sub> |

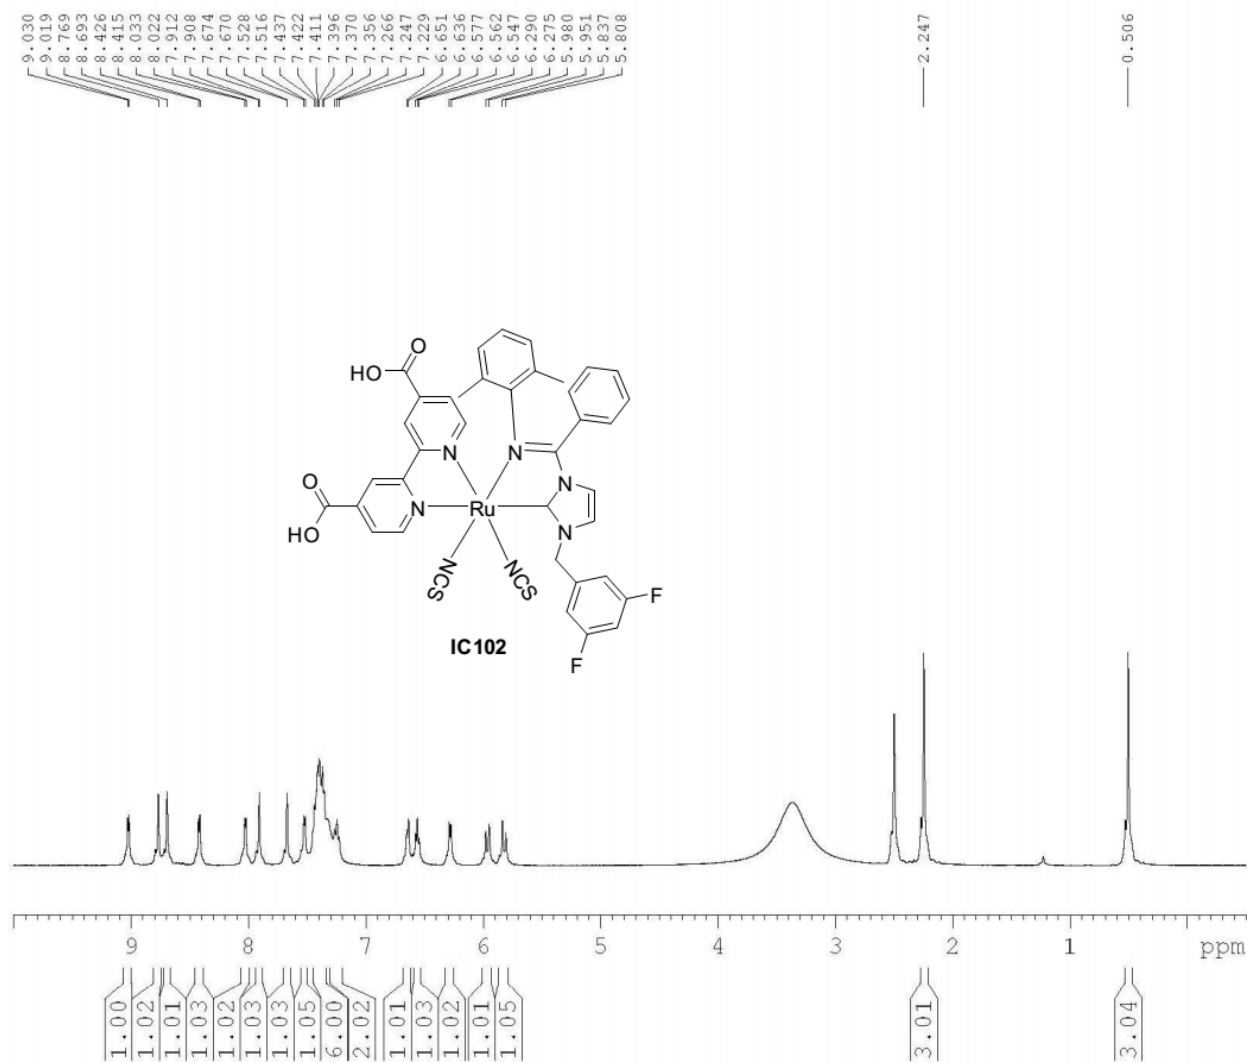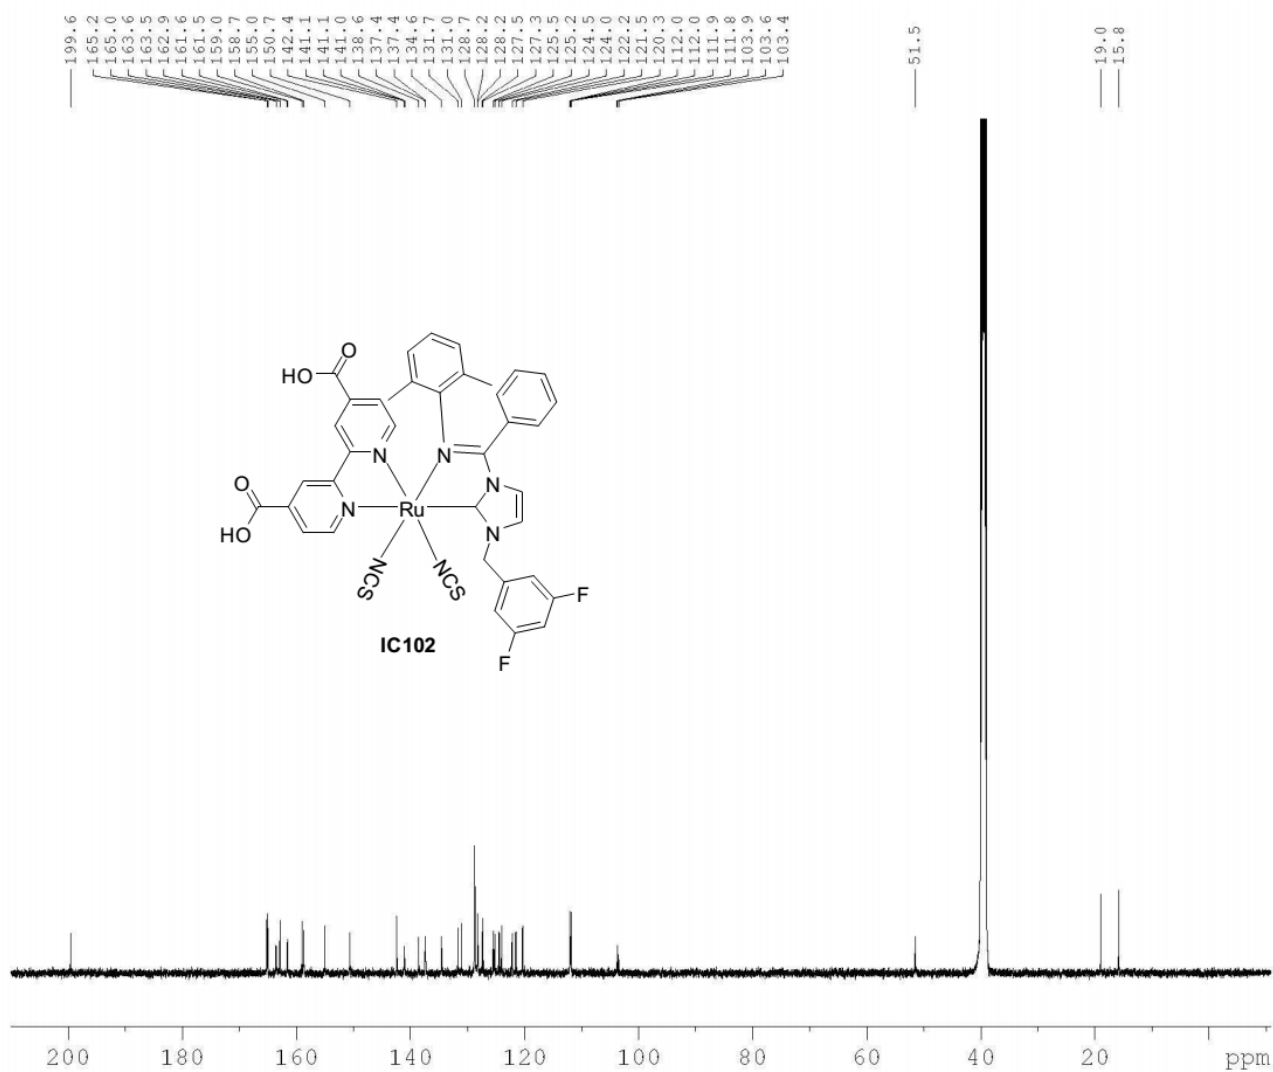

107-IC101-2-COOH-H#1-12 RT: 0.00-0.16 AV: 12

T: FTMS - p ESI Full ms [150.00-2000.00]

m/z= 848.21-887.87

Isotope Min Max

C-12 0 39

H-1 0 42

O-16 0 4

N-14 0 7

S-32 0 2

F-19 0 2

Ru-102 0 1

Charge 1

Mass tolerance 1000.00 ppm

Nitrogen rule not used

RDB equiv -1.00-100.00

max results 1

| m/z      | Intensity | Relative | Theo. Mass | Delta<br>(ppm) | Composition                                                                                    |
|----------|-----------|----------|------------|----------------|------------------------------------------------------------------------------------------------|
| 862.0660 | 332934.9  | 100.00   | 862.0650   | 1.10           | C <sub>39</sub> H <sub>28</sub> O <sub>4</sub> N <sub>7</sub> F <sub>2</sub> Ru S <sub>2</sub> |

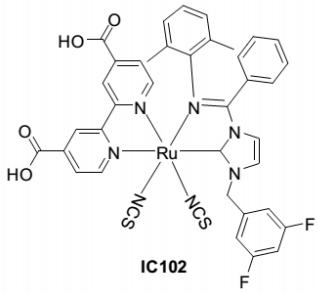

Supplement: d0nj02220a1.pdf [file d0nj02220a1.pdf]
